# Supplementary material for: French recommendations for the management of systemic necrotizing vasculitides (polyarteritis nodosa and ANCA-associated vasculitides)
Source: PubMed Central journal article supplement (PMC7771069; doi:10.1186/s13023-020-01621-3), 2020-12-29
Supplement: 13023_2020_1621_MOESM1_ESM.pdf [file 13023_2020_1621_MOESM1_ESM.pdf]

## APPENDIX 1 – LIST OF REFERRAL CENTERS AND CENTERS FOR SPECIALIZED CARE OF THE ORGANIZATION FA<sup>2</sup>R FOR SYSTEMIC AUTOIMMUNE AND AUTOINFLAMMATORY DISEASES

| Referral Centers – coordinating sites and sites for ADULTS                                                  |                           |                    |            |
|-------------------------------------------------------------------------------------------------------------|---------------------------|--------------------|------------|
| Referral center for rare and systemic autoimmune diseases of the North and Northwest (coordinating site)    | Lille, CHU                | HACHULLA           | Éric       |
| Referral center for rare and systemic autoimmune diseases of the North and Northwest (constitutive site)    | Brest, CHU                | DEVAUCHELLE-PENSEC | Valérie    |
| Referral center for lupus, antiphospholipid syndrome and other rare autoimmune diseases (coordinating site) | Paris, AP-HP              | AMOURA             | Zahir      |
| Referral center for lupus, antiphospholipid syndrome and other rare autoimmune diseases (constitutive site) | Martinique, CHU           | DELIGNY            | Christophe |
| Referral center for rare and systemic autoimmune diseases of Ile-de-France (coordinating site)              | Paris, AP-HP              | MOUTHON            | Luc        |
| Referral center for rare and systemic autoimmune diseases of Ile-de-France (constitutive site)              | Le Kremlin-Bicêtre, AP-HP | MARIETTE           | Xavier     |
| Referral center for rare and systemic autoimmune diseases of Ile-de-France (constitutive site)              | Paris, AP-HP              | CACOUB             | Patrice    |
| Referral center for rare and systemic autoimmune diseases of Ile-de-France (constitutive site)              | Paris, AP-HP              | FARGE-BANCEL       | Dominique  |
| Referral center for rare and systemic autoimmune diseases of the East and Southwest (coordinating site)     | Strasbourg, CHRU          | MARTIN             | Thierry    |
| Referral center for rare and systemic autoimmune diseases of the East and Southwest (constitutive site)     | Bordeaux, CHU             | RICHEZ             | Christophe |
| CEREMAIA referral center for autoinflammatory diseases and inflammatory amyloidosis (constitutive site)     | Paris, AP-HP              | GRATEAU            | Gilles     |
| CEREMAIA referral center for autoinflammatory diseases and inflammatory amyloidosis (constitutive site)     | Paris, AP-HP              | SAADOUN            | David      |

## Referral Centers – PEDIATRIC coordinating sites and constitutive sites

|                                                                                                                             |                    |                    |           |
|-----------------------------------------------------------------------------------------------------------------------------|--------------------|--------------------|-----------|
| CEREMAIA referral center for autoinflammatory diseases and inflammatory amyloidosis (coordinating site)                     | Le Kremlin Bicêtre | KONÉ-PAUT          | Isabelle  |
| CEREMAIA referral center for autoinflammatory diseases and inflammatory amyloidosis (constitutive site)                     | Montpellier, CHU   | TOUITOU            | Isabelle  |
| CEREMAIA referral center for autoinflammatory diseases and inflammatory amyloidosis (constitutive site)                     | Versailles, CH     | HENTGEN            | Véronique |
| RAISE referral center for inflammatory rheumatism and rare and systemic autoimmune diseases of children (coordinating site) | Paris, AP-HP       | QUARTIER-DIT-MAIRE | Pierre    |
| RAISE referral center for inflammatory rheumatism and rare and systemic autoimmune diseases of children (constitutive site) | Lyon, CHU          | BELOT              | Alexandre |
| RAISE referral center for inflammatory rheumatism and rare and systemic autoimmune diseases of children (constitutive site) | Paris, AP-HP       | MEINZER            | Ulrich    |

## Centers for specialized care for ADULTS for rare and systemic autoimmune diseases

|                                                                                  |                       |               |           |
|----------------------------------------------------------------------------------|-----------------------|---------------|-----------|
| Center for specialized care for adults for rare and systemic autoimmune diseases | Angers, CHU           | LAVIGNE       | Christian |
| Center for specialized care for adults for rare and systemic autoimmune diseases | Amiens, CHU           | DUHAUT        | Pierre    |
| Center for specialized care for adults for rare and systemic autoimmune diseases | Anncy-Genevois, CH    | BEREZNE       | Alice     |
| Center for specialized care for adults for rare and systemic autoimmune diseases | Besançon, CHRU        | MAGY-BERTRAND | Nadine    |
| Center for specialized care for adults for rare and systemic autoimmune diseases | Boulogne-sur-Mer, CHU | BATAILLE      | Pierre    |
| Center for specialized care for adults for rare and systemic autoimmune diseases | Caen, CHU             | AOUBA         | Achille   |
| Center for specialized care for adults for rare and systemic autoimmune diseases | Clermont-Ferrand, CHU | AUMAITRE      | Olivier   |
| Center for specialized care for adults for rare and systemic autoimmune diseases | Colmar, CH            | KIEFFER       | Pierre    |
| Center for specialized care for adults for rare and systemic autoimmune diseases | Créteil, AP-HP        | GODEAU        | Bertrand  |
| Center for specialized care for adults for rare and systemic autoimmune diseases | Dijon, CHU            | BONNOTTE      | Bernard   |
| Center for specialized care for adults for rare and systemic autoimmune diseases | Tours, CHU            | DIOT          | Élisabeth |

|                                                                                  |                        |            |                   |
|----------------------------------------------------------------------------------|------------------------|------------|-------------------|
| Center for specialized care for adults for rare and systemic autoimmune diseases | Grenoble, CHU          | BOUILLET   | Laurence          |
| Center for specialized care for adults for rare and systemic autoimmune diseases | Guadeloupe, CHU        | CORDEL     | Nadège            |
| Center for specialized care for adults for rare and systemic autoimmune diseases | Ile de la Réunion, CHU | RAFFRAY    | Loïc              |
| Center for specialized care for adults for rare and systemic autoimmune diseases | Limoges, CHU           | FAUCHAIS   | Anne-Laure        |
| Center for specialized care for adults for rare and systemic autoimmune diseases | Lyon, CHU              | HOT        | Arnaud            |
| Center for specialized care for adults for rare and systemic autoimmune diseases | Marseille, AP-HM       | HARLE      | Jean-Robert       |
| Center for specialized care for adults for rare and systemic autoimmune diseases | Montpellier, CHU       | MOREL      | Jacques           |
| Center for specialized care for adults for rare and systemic autoimmune diseases | Nancy, CHRU            | WAHL       | Denis             |
| Center for specialized care for adults for rare and systemic autoimmune diseases | Nantes, CHU            | HAMIDOU    | Mohamed           |
| Center for specialized care for adults for rare and systemic autoimmune diseases | Nice, CHU              | FUZIBET    | Jean-Gabriel      |
| Center for specialized care for adults for rare and systemic autoimmune diseases | Paris, AP-HP           | UZUNHAN    | Yurdagul          |
| Center for specialized care for adults for rare and systemic autoimmune diseases | Paris, AP-HP           | PAPO       | Thomas            |
| Center for specialized care for adults for rare and systemic autoimmune diseases | Paris, GHDCSS          | ZIZA       | Jean-Marc         |
| Center for specialized care for adults for rare and systemic autoimmune diseases | Paris, AP-HP           | KARRAS     | Georges-Alexandre |
| Center for specialized care for adults for rare and systemic autoimmune diseases | Paris, AP-HP           | FAIN       | Olivier           |
| Center for specialized care for adults for rare and systemic autoimmune diseases | Saint-Denis, CH        | LHOTE      | François          |
| Center for specialized care for adults for rare and systemic autoimmune diseases | Poitiers, CHU          | ROBLOT     | Pascal            |
| Center for specialized care for adults for rare and systemic autoimmune diseases | Reims, CHU             | PENNAFORTE | Jean-Loup         |
| Center for specialized care for adults for rare and systemic autoimmune diseases | Rennes, CHU            | JEGO       | Patrick           |
| Center for specialized care for adults for rare and systemic autoimmune diseases | Rouen, CHU             | LEVESQUE   | Herve             |
| Center for specialized care for adults for rare and systemic autoimmune diseases | Saint-Étienne, CHU     | CATHEBRAS  | Pascal            |
| Center for specialized care for adults for rare and systemic autoimmune diseases | Toulouse, CHU          | CHAUVEAU   | Dominique         |
| Center for specialized care for adults for rare and systemic autoimmune diseases | Valenciennes, CH       | QUEMENEUR  | Thomas            |

| Centers of specialized PEDIATRIC care                                                                                                      |                 |               |            |
|--------------------------------------------------------------------------------------------------------------------------------------------|-----------------|---------------|------------|
| RAISE center for specialized care of the referral center for inflammatory rheumatism and rare and systemic autoimmune diseases in children | Amiens          | DJEDDI        | Djamal     |
| RAISE center for specialized care of the referral center for inflammatory rheumatism and rare and systemic autoimmune diseases in children | Angers          | PELLIER       | Isabelle   |
| RAISE center for specialized care of the referral center for inflammatory rheumatism and rare and systemic autoimmune diseases in children | Belfort         | LOHSE         | Anne       |
| RAISE center for specialized care of the referral center for inflammatory rheumatism and rare and systemic autoimmune diseases in children | Besançon        | BALLOT-SCHMIT | Claire     |
| RAISE center for specialized care of the referral center for inflammatory rheumatism and rare and systemic autoimmune diseases in children | Brest           | DEVAUCHELLE   | Valérie    |
| RAISE center for specialized care of the referral center for inflammatory rheumatism and rare and systemic autoimmune diseases in children | Grenoble        | BARBIER       | Catherine  |
| RAISE center for specialized care of the referral center for inflammatory rheumatism and rare and systemic autoimmune diseases in children | Marne-la-Vallée | AGBO-KPATI    | Placide    |
| RAISE center for specialized care of the referral center for inflammatory rheumatism and rare and systemic autoimmune diseases in children | Marseille       | JURQUET       | Anne-Laure |
| RAISE center for specialized care of the referral center for inflammatory rheumatism and rare and systemic autoimmune diseases in children | Montpellier     | JEZIORSKI     | Éric       |
| RAISE center for specialized care of the referral center for inflammatory rheumatism and rare and systemic autoimmune diseases in children | Nantes          | LACROIX       | Sylvie     |
| RAISE center for specialized care of the referral center for inflammatory rheumatism and rare and systemic autoimmune diseases in children | Orléans         | TALMUD        | Déborah    |
| RAISE center for specialized care of the referral center for inflammatory rheumatism and rare and systemic autoimmune diseases in children | Poitiers        | SOLAU-GERVAIS | Élisabeth  |

|                                                                                                                                                                                                                    |                        |               |           |
|--------------------------------------------------------------------------------------------------------------------------------------------------------------------------------------------------------------------|------------------------|---------------|-----------|
| RAISE center for specialized care of the referral center for inflammatory rheumatism and rare and systemic autoimmune diseases in children                                                                         | Rouen                  | GRALL-LEROSEY | Martine   |
| RAISE center for specialized care of the referral center for inflammatory rheumatism and rare and systemic autoimmune diseases in children                                                                         | Toulouse               | PAJOT         | Christine |
| RAISE center for specialized care of the referral center for inflammatory rheumatism and rare and systemic autoimmune diseases in children                                                                         | Villefranche-sur-Saône | REMY-PICCOLO  | Vanessa   |
| RAISE center for specialized care of the referral center for inflammatory rheumatism and rare and systemic autoimmune diseases in children                                                                         | Martinique             | HATCHUEL      | Yves      |
| RAISE center of specialized case of the referral center for inflammatory rheumatism and rare and systemic autoimmune diseases in children                                                                          | Paris, AP-HP           | WIPFF         | Julien    |
| Center of pediatric specialized care of CEREMAIA referral center for autoinflammatory diseases and inflammatory amyloidosis                                                                                        | Grenoble               | PAGNIER       | Anne      |
| Center of pediatric specialized care of CEREMAIA referral center for autoinflammatory diseases and inflammatory amyloidosis                                                                                        | Lyon, CHU              | BELOT         | Alexandre |
| Center of pediatric specialized care of CEREMAIA referral center for autoinflammatory diseases and inflammatory amyloidosis                                                                                        | Marseille              | RETORNAZ      | Karine    |
| Center of pediatric specialized care of CEREMAIA referral center for autoinflammatory diseases and inflammatory amyloidosis                                                                                        | Toulouse               | DECRAMER      | Stéphane  |
| Center of pediatric specialized care of CEREMAIA and RAISE referral centers for autoinflammatory disease, inflammatory amyloidosis, inflammatory rheumatism, and rare and systemic autoimmune diseases in children | Bordeaux               | PILLET        | Pascal    |
| Center of pediatric specialized care of CEREMAIA and RAISE referral centers for autoinflammatory disease, inflammatory amyloidosis, inflammatory rheumatism, and rare and systemic autoimmune diseases in children | Caen                   | DESDOITS      | Alexandra |

|                                                                                                                                                                                                                    |                  |            |            |
|--------------------------------------------------------------------------------------------------------------------------------------------------------------------------------------------------------------------|------------------|------------|------------|
| Center of pediatric specialized care of CEREMAIA and RAISE referral centers for autoinflammatory disease, inflammatory amyloidosis, inflammatory rheumatism, and rare and systemic autoimmune diseases in children | Clermont-Ferrand | MERLIN     | Étienne    |
| Center of pediatric specialized care of CEREMAIA and RAISE referral centers for autoinflammatory disease, inflammatory amyloidosis, inflammatory rheumatism, and rare and systemic autoimmune diseases in children | Dijon            | BOTTOLIER  | Élodie     |
| Center of pediatric specialized care of CEREMAIA and RAISE referral centers for autoinflammatory disease, inflammatory amyloidosis, inflammatory rheumatism, and rare and systemic autoimmune diseases in children | Lille            | REUMAUX    | Héloïse    |
| Center of pediatric specialized care of CEREMAIA and RAISE referral centers for autoinflammatory disease, inflammatory amyloidosis, inflammatory rheumatism, and rare and systemic autoimmune diseases in children | Nancy            | LEMELLE    | Irène      |
| Center of pediatric specialized care of CEREMAIA and RAISE referral centers for autoinflammatory disease, inflammatory amyloidosis, inflammatory rheumatism, and rare and systemic autoimmune diseases in children | Nîmes            | TRAN       | Tu-Anh     |
| Center of pediatric specialized care of CEREMAIA and RAISE referral centers for autoinflammatory disease, inflammatory amyloidosis, inflammatory rheumatism, and rare and systemic autoimmune diseases in children | Reims            | PIETREMENT | Christine  |
| Center of pediatric specialized care of CEREMAIA and RAISE referral centers for autoinflammatory disease, inflammatory amyloidosis, inflammatory rheumatism, and rare and systemic autoimmune diseases in children | Rennes           | DESPERT    | Véronique  |
| Center of pediatric specialized care of CEREMAIA and RAISE referral centers for autoinflammatory disease, inflammatory amyloidosis, inflammatory rheumatism, and rare and systemic autoimmune diseases in children | Saint-Étienne    | STEPHAN    | Jean-Louis |

|                                                                                                                                                                                                                    |            |        |         |
|--------------------------------------------------------------------------------------------------------------------------------------------------------------------------------------------------------------------|------------|--------|---------|
| Center of pediatric specialized care of CEREMAIA and RAISE referral centers for autoinflammatory disease, inflammatory amyloidosis, inflammatory rheumatism, and rare and systemic autoimmune diseases in children | Strasbourg | TERZIC | Joëlle  |
| Center of pediatric specialized care of CEREMAIA and RAISE referral centers for autoinflammatory disease, inflammatory amyloidosis, inflammatory rheumatism, and rare and systemic autoimmune diseases in children | Tours      | HOARAU | Cyrille |
