# Supplementary material for: French recommendations for the management of systemic necrotizing vasculitides (polyarteritis nodosa and ANCA-associated vasculitides)
Source: Orphanet J Rare Dis. 2020 Dec 29;15(Suppl 2):351. doi: 10.1186/s13023-020-01621-3 (PMC7771069; doi:10.1186/s13023-020-01621-3)
Supplement: Supplementary file 2 — Additional file 2. Appendix 2—Medications which may be associated with the occurrence of vasculitis. [file 13023_2020_1621_MOESM2_ESM.pdf]

## APPENDIX 2 – MEDICATIONS WHICH MAY BE ASSOCIATED WITH THE OCCURRENCE OF VASCULITIS

| Medications often acting as the source of vasculitis |
|------------------------------------------------------|
| Allopurinol                                          |
| Alpha-methyldopa                                     |
| NSAIDS                                               |
| Anti-TNF-alpha                                       |
| Azathioprine                                         |
| Beta-Lactam antibiotics                              |
| Cimetidine                                           |
| Clozapine                                            |
| D-Penicillamine                                      |
| Hydantoin                                            |
| Hydralazine                                          |
| Ketoconazole                                         |
| Levamisole                                           |
| Minocycline                                          |
| Phenothiazine                                        |
| Propylthiouracil                                     |
| Quinidine                                            |
| Quinolones                                           |
| Gold salts                                           |
| Sulfonamides                                         |
| Thiazides                                            |

[illegible]
